# Supplementary material for: Myeloid Trem2 Dynamically Regulates the Induction and Resolution of Hepatic Ischemia-Reperfusion Injury Inflammation
Source: Int J Mol Sci. 2023 Mar 28;24(7):6348. doi: 10.3390/ijms24076348 (PMC10094065; doi:10.3390/ijms24076348)
Supplement: Supplementary file 1 [file ijms-24-06348-s001.zip › Supplementary Table S1.xlsx]

## Sheet: panel
	Table S1. Primer sequences
	Primer	forward	reverse
	M-Trem2	CTGGAACCGTCACCATCACTC	CGAAACTCGATGACTCCTCGG
	M-Cox2	TGTGACTGTACCCGGACTGG	TGCACATTGTAAGTAGGTGGAC
	M-Rac1	ACAAAGCCTTCTTAAAGCCTTA	GCGGTCTTCTTAGCAACA
	M-IL6	GCTACCAAACTGGATATAATCAGGA	CCAGGTAGCTATGGTACTCCAGAA
	M-IL10	CCAAGCCTTGGAAAGA	TTTTCACAGGGGAGAAATCG
	M-TNFa	GCCTCTTCTCATTCCTGCTTGT	GATGATCTGAGTGTGAGGGTCTG
	M-iNOS	GGTCTTTGAAATCCCTCCTGA	AGCTCCTGGAACCACTCGTA
	M-ARG1	TGTGAATGCGCCACATGA	GCAGCTAGAATGAGAGGCG
	M-CX3CL1	ACGAAATGCGAAATCATGTGC	CTGTGTCGTCTCCAGGACAA
	M-beta-Actin	AGCGAGCATCCCCCAAAGTT	GGGCACGAAGGCTCATCATT
